# Supplementary material
Source: PubMed Central journal article supplement (PMC3152494)
Supplement: supp_blood-2011-01-328567_Document1.pdf [file supp_blood-2011-01-328567_Document1.pdf]

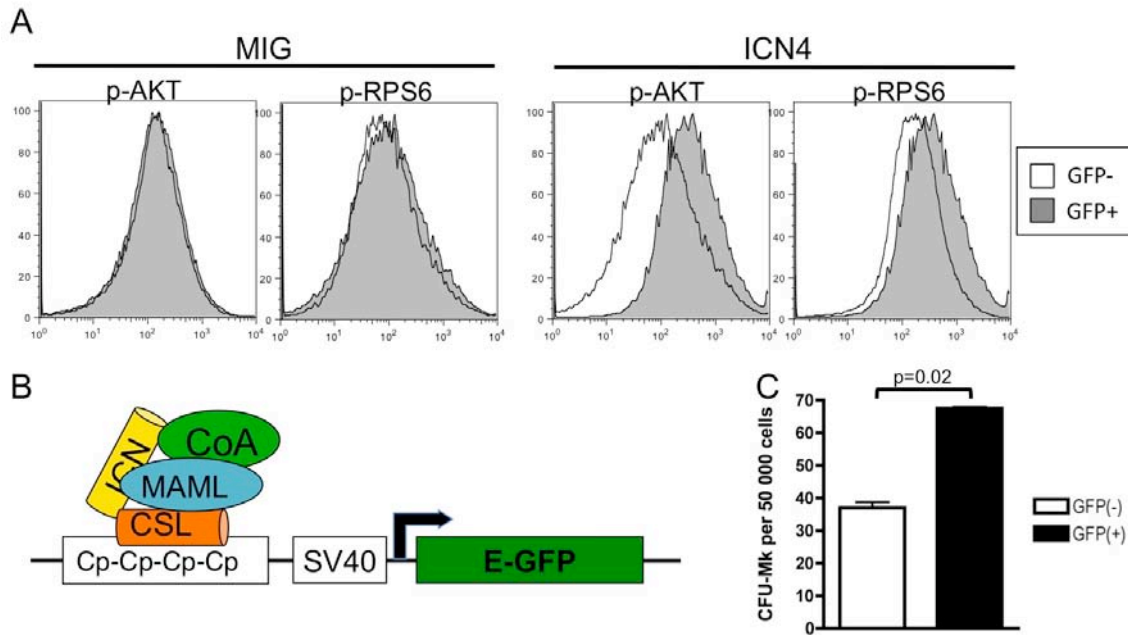

### Figure S1. Analysis of TNR and ICN4 transplant mice

**(A)** Flow-sorted Lineage<sup>-</sup>, propidium iodide<sup>-</sup> (Lin<sup>-</sup>PI<sup>-</sup>) cells from either MSCV-IRES-GFP or MIG-ICN4 infected bone marrow recipients were fixed/permeabilized and prepared for phospho-flow analyses as described in Figure 1. Histograms show phosphorylation levels of AKT and RPS6 in the GFP<sup>+</sup> vs. the GFP<sup>-</sup> compartment within the same animals and are a representative of three independent animals analyzed.

**(B)** Scheme depicting the TNR mouse model. The transgenic construct consists of four tandem copies of the C-promoter binding factor 1 (CBF1/RBPSUH) binding site of the Epstein-Barr virus major latency C promoter (Cp), followed by the SV40 minimal promoter and the coding sequence for EGFP. Expression of EGFP happens when the promoter is activated, by binding of a complex comprising RBPJ, MAML1 and ICN to the upstream RBPJ binding elements.

**(C)** MegaCult assay with GFP<sup>+</sup> and GFP<sup>-</sup> whole bone marrow cells for assessment of CFU-MK potential. Mean±SEM of triplicate experiments is represented.

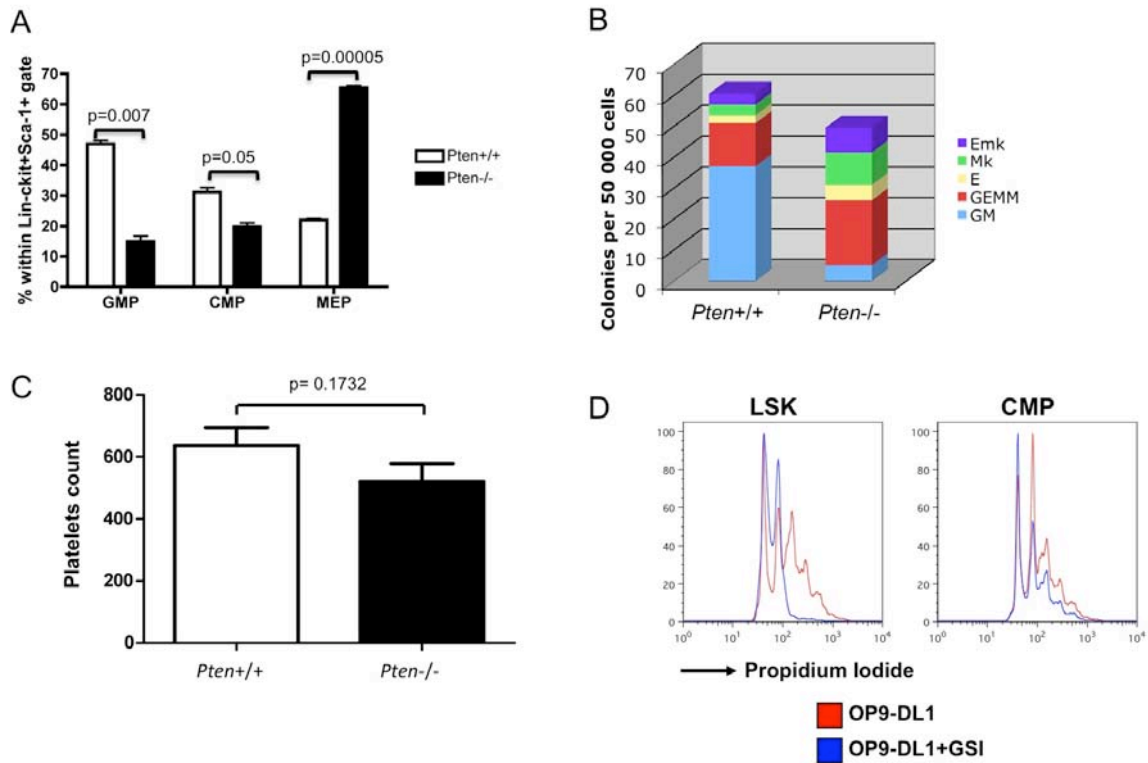

### Figure S2. Analysis of *Pten*-deficient animals

(A) Flow cytometric analysis of myeloid progenitors within the Lineage<sup>-</sup>ckit<sup>+</sup>Sca1<sup>+</sup> population of *Pten*<sup>+/+</sup> and *Pten*<sup>-/-</sup> mice two weeks post plpC injection. Bar graphs show the mean±SEM of five independent experiments.

(B) Whole bone marrow cells from *Pten*<sup>+/+</sup> and *Pten*<sup>-/-</sup> mice were plated in M3434 methylcellulose media supplemented TPO. Colonies were scored after seven days. GM: Granulocyte-Macrophage colony, GEMM: Granulocyte-Macrophage-Erythroid-Megakaryocyte colony, EMK: Erythroid-Megakaryocyte colony, E: Erythroid colony, Mk: Megakaryocyte colony.

(C) Bar graphs representation of the platelet counts showing the mean±SEM platelets count for *Pten*<sup>+/+</sup> (n=12) and *Pten*<sup>-/-</sup> (n=11) mice.

(D) Ploidy analysis was performed on hematopoietic cells obtained from PTEN<sup>-/-</sup> LSK and CMP plated on OP9-DL1+/-GSI for 6 and 4 days, respectively. Analysis was gated on CD45<sup>+</sup>CD41<sup>+</sup> cells as shown in Figure 3F, 3G.

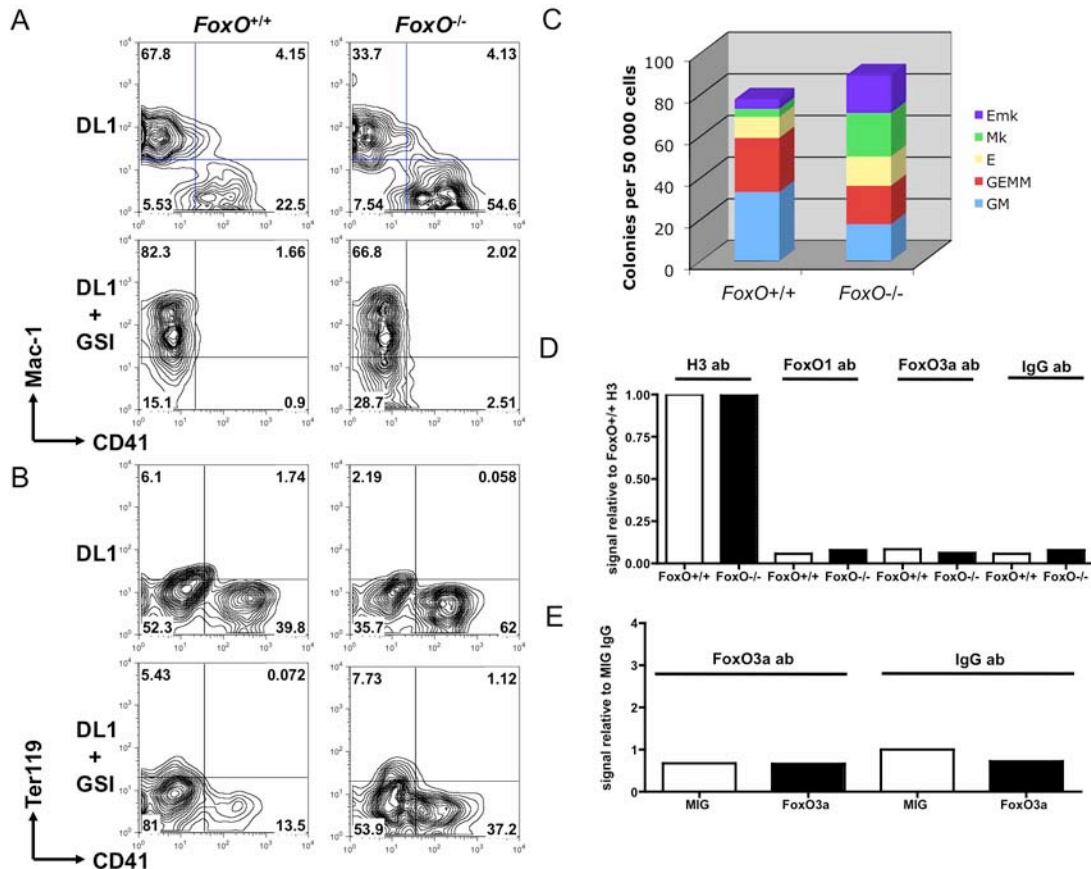

### Figure S3. Megakaryocytic potential of *FoxO*-deficient cells

**(A)** LSK cells from *FoxO1/3/4cKO-Mx1Cre<sup>-</sup>* (*FoxO*<sup>+/+</sup>) or *FoxO1/3/4cKO-Mx1Cre<sup>+</sup>* (*FoxO*<sup>-/-</sup>) mice were flow-sorted three weeks post plpC treatment and cultured on OP9-DL1 stroma in the presence or absence of 1  $\mu$ M GSI. After six days of co-cultures, cells were analyzed by flow cytometry for the development of CD41<sup>+</sup> cells within the CD45<sup>+</sup> gate.

**(B)** CMP cells from *FoxO*<sup>+/+</sup> or *FoxO*<sup>-/-</sup> mice were purified and analyzed as in (A).

**(C)** Whole bone marrow cells from *FoxO*<sup>+/+</sup> or *FoxO*<sup>-/-</sup> animals were plated in M3434 methylcellulose media supplemented with 50ng/ml TPO. Colonies were scored after seven days. GM: Granulocyte-Macrophage colony, GEMM: Granulocyte-Macrophage-Erythroid-Megakaryocyte colony, EMk: Erythroid-Megakaryocyte colony, E: Erythroid colony, Mk: Megakaryocyte colony.

**(D)** Chromatin Immunoprecipitation assay (ChIP) of *FoxO*<sup>+/+</sup> or *FoxO*<sup>-/-</sup> Lin<sup>-</sup> cells using an anti-FOXO1 or an anti-FOXO3a antibody to test binding of these factors to the 3' untranslated region (UTR) region of the *Hes1* gene. Bar graphs represent the mean  $\pm$  SEM of triplicate experiments and all signals are normalized to *FoxO*<sup>+/+</sup> sample pulled down with anti-Histone H3 antibody

**(E)** ChIP analysis of Lin<sup>-</sup> cells infected with an empty MIG vector or with a wildtype *FoxO3a* construct and pulled down with either an anti-FOXO3a antibody. All signals at the *Hes-1* 3'UTR region are normalized to MIG cells pulled down with an anti-IgG antibody and bar graphs represent the mean  $\pm$  SEM of triplicate experiments.
